# Supplementary material
Source: PubMed Central journal article supplement (PMC3631702)
Supplement: NIHMS52618-supplement-1.pdf [file NIHMS52618-supplement-1.pdf]

# A Shock Tube and Chemical Kinetic Modeling Study of the Oxidation of 2,5-Dimethylfuran

Baptiste Sirjean,<sup>1</sup> René Fournet,<sup>1,\*</sup>

Pierre-Alexandre Glaude,<sup>1</sup> Frédérique Battin-Leclerc,<sup>1</sup> Weijing Wang<sup>2</sup>, Matthew A.

Oehlschlaeger<sup>2,\*</sup>

<sup>1</sup> *Laboratoire Réactions et Génie des Procédés (LRGP), Université de Lorraine, CNRS,*

*BP 20451, 1 rue Grandville, 54001 Nancy, France*

<sup>2</sup> *Department of Mechanical, Aerospace, and Nuclear Engineering, Rensselaer Polytechnic*

*Institute, Troy, NY, USA*

\*Authors to whom correspondence should be addressed:

René Fournet – rene.fournet@univ-lorraine.fr

Phone: +33 383175202

Matthew A. Oehlschlaeger – oehlsma@rpi.edu

Phone: 518.276.8115

**Supplementary Data** for “A Shock Tube and Chemical Kinetic Modeling Study of the Oxidation of 2,5-Dimethylfuran” by Sirjean et al.

**Table S1.** Experimental data: ignition delay time measurements for DMF/O<sub>2</sub>/Ar mixtures. DMF: 2,5-dimethylfuran,  $\phi$ : equivalence ratio,  $\tau$ : ignition delay time.

| $\phi$ | %-molar DMF | P [bar] | T [K] | $\tau$ [ $\mu$ s] |
|--------|-------------|---------|-------|-------------------|
| 1      | 1           | 1.34    | 1403  | 1045              |
| 1      | 1           | 1.34    | 1474  | 463               |
| 1      | 1           | 1.26    | 1533  | 326               |
| 1      | 1           | 1.27    | 1663  | 122               |
| 1      | 1           | 1.19    | 1685  | 102               |
| 1      | 0.5         | 1.46    | 1387  | 1555              |
| 1      | 0.5         | 1.43    | 1424  | 1025              |
| 1      | 0.5         | 1.40    | 1485  | 574               |
| 1      | 0.5         | 1.33    | 1525  | 391               |
| 1      | 0.5         | 1.29    | 1636  | 173               |
| 1      | 0.5         | 1.23    | 1716  | 110               |
| 1      | 0.5         | 1.14    | 1792  | 75                |
| 1      | 0.5         | 1.06    | 1831  | 58                |
| 1      | 0.25        | 1.40    | 1433  | 1224              |
| 1      | 0.25        | 1.36    | 1469  | 826               |
| 1      | 0.25        | 1.36    | 1514  | 630               |
| 1      | 0.25        | 1.30    | 1530  | 577               |
| 1      | 0.25        | 1.34    | 1602  | 281               |
| 1      | 0.25        | 1.27    | 1701  | 148               |
| 1      | 0.25        | 1.21    | 1767  | 112               |
| 1      | 1           | 3.97    | 1310  | 1324              |
| 1      | 1           | 3.79    | 1357  | 682               |
| 1      | 1           | 3.57    | 1372  | 610               |
| 1      | 1           | 3.41    | 1388  | 525               |
| 1      | 1           | 3.30    | 1451  | 259               |
| 1      | 1           | 3.23    | 1571  | 118               |
| 1      | 1           | 2.96    | 1667  | 52                |
| 0.5    | 1           | 1.43    | 1318  | 1413              |
| 0.5    | 1           | 1.44    | 1397  | 618               |
| 0.5    | 1           | 1.36    | 1472  | 329               |
| 0.5    | 1           | 1.22    | 1521  | 197               |
| 0.5    | 0.5         | 1.44    | 1300  | 2306              |
| 0.5    | 0.5         | 1.40    | 1360  | 1325              |
| 0.5    | 0.5         | 1.50    | 1372  | 1124              |
| 0.5    | 0.5         | 1.39    | 1439  | 507               |
| 0.5    | 0.5         | 1.42    | 1547  | 198               |
| 0.5    | 0.5         | 1.31    | 1599  | 143               |
| 0.5    | 0.5         | 1.18    | 1664  | 100               |
| 1.5    | 1           | 1.32    | 1340  | 2455              |
| 1.5    | 1           | 1.24    | 1373  | 1668              |
| 1.5    | 1           | 1.32    | 1540  | 402               |
| 1.5    | 1           | 1.28    | 1632  | 195               |
| 1.5    | 1           | 1.20    | 1723  | 105               |
| 1.5    | 0.5         | 1.45    | 1392  | 2023              |
| 1.5    | 0.5         | 1.42    | 1427  | 1619              |
| 1.5    | 0.5         | 1.39    | 1477  | 977               |
| 1.5    | 0.5         | 1.34    | 1538  | 528               |
| 1.5    | 0.5         | 1.34    | 1690  | 206               |
| 1.5    | 0.5         | 1.20    | 1705  | 191               |

**Table S2.** Name and structure of the species involved in the detailed mechanism of the DMF oxidation.

| Species | Name                               | Species | Name                               |
|---------|------------------------------------|---------|------------------------------------|
|         | DMF                                |         | R1C <sub>6</sub> H <sub>7</sub> O  |
|         | M2C <sub>6</sub> H <sub>8</sub> O  |         | R2C <sub>6</sub> H <sub>7</sub> O  |
|         | M3C <sub>6</sub> H <sub>8</sub> O  |         | R3C <sub>6</sub> H <sub>7</sub> O  |
|         | M4C <sub>6</sub> H <sub>8</sub> O  |         | R4C <sub>6</sub> H <sub>7</sub> O  |
|         | M5C <sub>6</sub> H <sub>8</sub> O  |         | R5C <sub>6</sub> H <sub>7</sub> O  |
|         | M6C <sub>6</sub> H <sub>8</sub> O  |         | R6C <sub>6</sub> H <sub>7</sub> O  |
|         | M7C <sub>6</sub> H <sub>8</sub> O  |         | R7C <sub>6</sub> H <sub>7</sub> O  |
|         | M8C <sub>6</sub> H <sub>8</sub> O  |         | R8C <sub>6</sub> H <sub>7</sub> O  |
|         | M9C <sub>6</sub> H <sub>8</sub> O  |         | R9C <sub>6</sub> H <sub>7</sub> O  |
|         | M10C <sub>6</sub> H <sub>8</sub> O |         | R10C <sub>6</sub> H <sub>7</sub> O |
|         | M11C <sub>6</sub> H <sub>8</sub> O |         | M2C <sub>6</sub> H <sub>6</sub> O  |
|         | CA1                                |         | M3C <sub>6</sub> H <sub>6</sub> O  |

|                                                                                     |          |                                                                                     |             |
|-------------------------------------------------------------------------------------|----------|-------------------------------------------------------------------------------------|-------------|
| 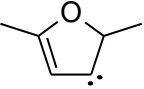   | CA2      |    | $C_5H_7Y\#$ |
|    | CA3      |    | $C_5H_7$    |
|    | CA4      |    | $C_5H_7Y$   |
|    | B1       |    | $M2C_6H_6O$ |
|    | B2       |    | $M3C_6H_6O$ |
|   | B3       |   | $M4C_6H_6O$ |
|  | M2-R1    |  | $M5C_6H_6O$ |
|  | M2-R2    |  | $B1C_6H_6O$ |
|  | DMF-3yl  |  | $C_4H_4O$   |
|  | DMF-3ylo |  | $R1C_6H_9O$ |
|  | MF       |  | $R3C_6H_9O$ |

|                                                                                   |          |                                                                                   |                                   |
|-----------------------------------------------------------------------------------|----------|-----------------------------------------------------------------------------------|-----------------------------------|
| 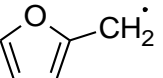 | furylCH2 |  | R7C <sub>6</sub> H <sub>9</sub> O |
|  | M5F-2yl  |  | MFH                               |
|  | M5F-2ylO |  | M5F-CH2O                          |
|  | MF-CHO   |  | furylCH2O                         |
|  | MF-CO    |  | furylCO                           |

**Table S3.** Geometries, frequencies and RRKM parameters for the reactant and transition state involved in the reaction  $\text{CH}_3\text{CF}_3 \rightarrow \text{CH}_2\text{CF}_2 + \text{HF}$

Geometries and frequencies obtained at the B3LYP/CBSB7 level of theory

**$\text{CH}_3\text{CF}_3$  (Cartesian coordinates )**

C 0.025794 1e-005 -2.6e-005  
C -1.47728 8.8e-005 -3e-006  
H -1.83923 0.853241 0.573577  
H -1.83922 0.070152 -1.02565  
H -1.83922 -0.92322 0.452083  
F 0.526992 1.12745 -0.552796  
F 0.526899 -0.084996 1.25276  
F 0.52684 -1.04254 -0.699946

**Transition state (Cartesian coordinates )**

C -0.314717 0.189218 1.4e-005  
C 0.494026 1.33579 4.5e-005  
H 0.503768 1.89403 0.927649  
H 1.41236 0.373914 -6.4e-005  
H 0.50365 1.89417 -0.927481  
F 1.32305 -0.888878 -4.4e-005  
F -0.85571 -0.295171 1.07395  
F -0.855738 -0.295077 -1.07396

**$\text{CH}_3\text{CF}_3$  (Frequencies  $\text{cm}^{-1}$ )**

3116.37 3116.15 3035.19  
1467.29 1467.11 1418.43  
1268.81 1219.69 1219.49  
957.793 957.432 816.949  
588.369 529.868 529.121  
358.358 358.161

**Transition state (Frequencies  $\text{cm}^{-1}$ )**

3213.2 3115.8 1708.87  
1546.04 1393.9 1379.94  
1275.84 995.752 928.231  
871.203 743.146 611.343  
504.061 454.078 383.04  
283.641 244.291

Imaginary frequency : -1781

**230.877** (treated as hindered rotor) with a hindrance of  $V=3.1 \text{ kcal mol}^{-1}$  and an internal symmetry  $\sigma_{\text{int}}=3$ .

**RRKM parameters used in Chemrate**

Lennard-Jones parameters for  $\text{CH}_3\text{CF}_3$  :  $\sigma=5.29 \text{ \AA}$  and  $\epsilon/k_B=468.4 \text{ K}$

Ar as buffer gas ( $\sigma=3.54 \text{ \AA}$  and  $\epsilon/k_B=39.95 \text{ K}$ ) and  $\langle \Delta E \rangle_{\text{down}}=750 \text{ cm}^{-1}$

Neon as buffer gas ( $\sigma=2.82 \text{ \AA}$  and  $\epsilon/k_B=32.8 \text{ K}$ ) and  $\langle \Delta E \rangle_{\text{down}}=750 \text{ cm}^{-1}$

Collision model: exponential down model

Time dependent solution (Divide and Conquer method)

Increment for energy:  $25 \text{ cm}^{-1}$
